# Supplementary material for: Selective regulation of chemosensitivity in glioblastoma by phosphatidylinositol 3-kinase beta
Source: PubMed Central journal article supplement — iScience. 2024 May 7;27(6):109921. doi: 10.1016/j.isci.2024.109921 (PMC11133927; doi:10.1016/j.isci.2024.109921), 2024-05-07
Supplement: mmc1.pdf [file mmc1.pdf]

## **Supplemental information**

### **Selective regulation of chemosensitivity in glioblastoma by phosphatidylinositol 3-kinase beta**

**Kevin J. Pridham, Kasen R. Hutchings, Patrick Beck, Min Liu, Eileen Xu, Erin Saechin, Vincent Bui, Chinkal Patel, Jamie Solis, Leah Huang, Allison Tegge, Deborah F. Kelly, and Zhi Sheng**

Table S1. DepMap glioma cell lines re-annotated, related to Figure 1.

| DepMap_ID  | Cell_Line_Name  | Tumor_Type              |                        | Note_in_Cellosaurus          | Grades | PMID     | MGMT_RNAseq | MGMT_Status* |
|------------|-----------------|-------------------------|------------------------|------------------------------|--------|----------|-------------|--------------|
|            |                 | DepMap                  | Cellosaurus            |                              |        |          |             |              |
| ACH-000323 | <b>42-MG-8A</b> | Astrocytoma             | glioblastoma           |                              | HGG    | 29740146 |             | Deficient    |
| ACH-000558 | <b>A-172</b>    | Glioblastoma            | glioblastoma           |                              | HGG    | 22986464 |             | Deficient    |
| ACH-000269 | <b>AM-38</b>    | Glioblastoma            | glioblastoma           |                              | HGG    | 25111384 |             | Deficient    |
| ACH-000464 | <b>CAS-1</b>    | Glioblastoma            | glioblastoma           |                              | HGG    |          | 0.014       | Deficient    |
| ACH-000244 | <b>DK-MG</b>    | Glioblastoma            | glioblastoma           |                              | HGG    |          | 0.070       | Deficient    |
| ACH-000738 | <b>GB-1</b>     | Glioblastoma            | glioblastoma           |                              | HGG    | 33335215 |             | Deficient    |
| ACH-000756 | <b>GI-1</b>     | Glioblastoma            | gliosarcoma            |                              | HGG    |          | 0.057       | Deficient    |
| ACH-000102 | <b>GMS-10</b>   | Glioblastoma            | glioblastoma           |                              | HGG    |          | 0.070       | Deficient    |
| ACH-000027 | <b>GOS-3</b>    | Glioblastoma            | glioblastoma           |                              | HGG    |          | 0.029       | Deficient    |
| ACH-000479 | <b>KNS-81</b>   | Glioblastoma            | glioblastoma           |                              | HGG    |          | 0.111       | Deficient    |
| ACH-000631 | <b>KS-1</b>     | Astrocytoma             | glioblastoma           |                              | HGG    |          | 0.251       | Deficient    |
| ACH-000595 | <b>LN-229</b>   | Glioblastoma            | glioblastoma           |                              | HGG    | 25111384 |             | Deficient    |
| ACH-000673 | <b>LN-443</b>   | Glioblastoma            | glioblastoma           |                              | HGG    |          | 0.000       | Deficient    |
| ACH-000676 | <b>LN-464</b>   | Glioblastoma            | glioblastoma           |                              | HGG    |          | 0.124       | Deficient    |
| ACH-000152 | <b>M059K</b>    | Glioblastoma            | glioblastoma           |                              | HGG    | 25111384 |             | Deficient    |
| ACH-001611 | <b>NP 8</b>     | Glioblastoma            | glioblastoma           |                              | HGG    |          | 0.000       | Deficient    |
| ACH-001622 | <b>Onda 7</b>   | Glioblastoma            | glioblastoma           |                              | HGG    |          | 0.000       | Deficient    |
| ACH-000376 | <b>SF-295</b>   | Glioblastoma            | glioblastoma           |                              | HGG    | 23958055 |             | Deficient    |
| ACH-000609 | <b>SF126</b>    | Astrocytoma             | glioblastoma           |                              | HGG    | 25111384 |             | Deficient    |
| ACH-000273 | <b>SF539</b>    | Glioma                  | gliosarcoma            |                              | HGG    |          | 0.163       | Deficient    |
| ACH-000504 | <b>SNB75</b>    | Glioma                  | glioblastoma           |                              | HGG    |          | 0.070       | Deficient    |
| ACH-000368 | <b>SNU-1105</b> | Glioblastoma            | glioblastoma           |                              | HGG    |          | 0.043       | Deficient    |
| ACH-000075 | <b>U-87 MG</b>  | Astrocytoma             | glioblastoma           |                              | HGG    | 23958055 |             | Deficient    |
| ACH-000283 | <b>A1207</b>    | Glioblastoma            | glioblastoma           |                              | HGG    | 22570426 |             | Positive     |
| ACH-001329 | <b>ANGM-CSS</b> | Glioblastoma            | glioblastoma           |                              | HGG    |          | 3.441       | Positive     |
| ACH-000098 | <b>GAMG</b>     | Glioblastoma            | glioblastoma           |                              | HGG    |          | 0.556       | Positive     |
| ACH-000231 | <b>KALS-1</b>   | Glioblastoma            | glioblastoma           |                              | HGG    |          | 3.995       | Positive     |
| ACH-000445 | <b>KNS-60</b>   | Glioblastoma            | glioblastoma           |                              | HGG    |          | 2.799       | Positive     |
| ACH-000819 | <b>LN-18</b>    | Glioblastoma            | glioblastoma           |                              | HGG    | 25111384 |             | Positive     |
| ACH-000634 | <b>LN-340</b>   | Glioblastoma            | glioblastoma           |                              | HGG    | 32361246 |             | Positive     |
| ACH-000455 | <b>LN-428</b>   | Glioblastoma            | glioblastoma           |                              | HGG    | 32982428 |             | Positive     |
| ACH-000215 | <b>LN382</b>    | Glioblastoma            | glioblastoma           |                              | HGG    |          | 3.350       | Positive     |
| ACH-001605 | <b>no.10</b>    | Glioblastoma            | glioblastoma           |                              | HGG    |          | 3.798       | Positive     |
| ACH-001623 | <b>Onda 8</b>   | Glioblastoma            | glioblastoma           |                              | HGG    |          | 3.454       | Positive     |
| ACH-000887 | <b>SF-172</b>   | Glioblastoma            | glioblastoma           |                              | HGG    |          | 3.446       | Positive     |
| ACH-000289 | <b>SNU-466</b>  | Glioblastoma            | glioblastoma           |                              | HGG    |          | 3.981       | Positive     |
| ACH-000543 | <b>SNU-489</b>  | Glioblastoma            | glioblastoma           |                              | HGG    |          | 1.982       | Positive     |
| ACH-000370 | <b>SNU-626</b>  | Glioblastoma            | glioblastoma           |                              | HGG    |          | 3.901       | Positive     |
| ACH-000571 | <b>T98G</b>     | Glioblastoma            | glioblastoma           |                              | HGG    | 25111384 |             | Positive     |
| ACH-000036 | <b>U343</b>     | Glioblastoma            | glioblastoma           |                              | HGG    | 12503076 |             | Positive     |
| ACH-000469 | <b>YH-13</b>    | Glioblastoma            | glioblastoma           |                              | HGG    | 25111384 |             | Positive     |
| ACH-000570 | <b>YKG1</b>     | Glioblastoma            | glioblastoma           |                              | HGG    |          | 4.146       | Positive     |
| ACH-001125 | MOGGCCM         | Glioma                  | Anaplastic astrocytoma |                              | HGG    |          | No data**   |              |
| ACH-001126 | MOGGUVW         | Glioma                  | Anaplastic astrocytoma |                              | HGG    |          | No data     |              |
| ACH-001606 | no.11           | Glioblastoma            | glioblastoma           |                              | HGG    |          | No data     |              |
| ACH-002223 | D-245MG         | Glioblastoma            | glioblastoma           |                              | HGG    |          | No data     |              |
| ACH-002224 | D-247MG         | Glioblastoma            | Gliosarcoma            |                              | HGG    | 29164620 | No data     | Deficient    |
| ACH-002225 | D-263MG         | Glioblastoma            | glioblastoma           |                              | HGG    |          | No data     |              |
| ACH-002226 | D-336MG         | Glioblastoma            | gliosarcoma            |                              | HGG    |          | No data     |              |
| ACH-002227 | D-392MG         | Glioblastoma            | glioblastoma           |                              | HGG    |          | No data     |              |
| ACH-002228 | D-423MG         | Glioblastoma            | glioblastoma           |                              | HGG    |          | No data     |              |
| ACH-002229 | D-502MG         | Glioblastoma            | glioblastoma           |                              | HGG    |          | No data     |              |
| ACH-002230 | D-542MG         | Glioblastoma            | glioblastoma           |                              | HGG    |          | No data     |              |
| ACH-002231 | D-566MG         | Glioblastoma            | glioblastoma           |                              | HGG    |          | No data     |              |
| ACH-002259 | KNS-81-FD       | Glioblastoma            | glioblastoma           |                              | HGG    |          | No data     |              |
| ACH-002268 | LN-405          | Glioblastoma            | glioblastoma           |                              | HGG    |          | No data     |              |
| ACH-000622 | KNS-42          | Glioblastoma            | glioblastoma           | Misidentified/contaminated** | HGG    | 20935218 |             | Deficient    |
| ACH-001624 | Onda 9          | Glioblastoma            | glioblastoma           | Misidentified                | HGG    |          | 3.379       | Positive     |
| ACH-002257 | KINGS-1         | Astrocytoma, anaplastic | Anaplastic astrocytoma | Misidentified                | HGG    |          |             |              |
| ACH-000623 | SNU-201         | Glioblastoma            | glioblastoma           | Contaminated                 | HGG    |          | 0.971       | Positive     |
| ACH-000883 | SW 1783         | Astrocytoma             | Anaplastic astrocytoma | Contaminated                 | HGG    | 24368590 |             | Positive     |
| ACH-000863 | DBTRG-05MG      | Glioblastoma            | Anaplastic astrocytoma | Contaminated                 | HGG    | 25111384 |             | Deficient    |

Continued from the previous page

| ACH-000137 | <b>8-MG-BA</b>  | Astrocytoma            | astrocytoma                             |               | II/III | 29740146 |         | Deficient |
|------------|-----------------|------------------------|-----------------------------------------|---------------|--------|----------|---------|-----------|
| ACH-001016 | <b>Becker</b>   | Glioma                 | astrocytoma                             |               | II/III |          | 0.163   | Deficient |
| ACH-000389 | <b>H4</b>       | Glioma                 | astrocytoma                             |               | II/III | 29749471 |         | Deficient |
| ACH-000067 | <b>Hs 683</b>   | Oligodendroglioma      | oligodendroglioma                       |               | II/III | 20517307 |         | Deficient |
| ACH-000128 | <b>LN-319</b>   | Astrocytoma            | astrocytoma                             |               | II/III | 23533755 |         |           |
| ACH-000200 | <b>NMC-G1</b>   | Glioblastoma           | astrocytoma                             |               | II/III |          | 0.124   | Deficient |
| ACH-000655 | <b>SF268</b>    | Glioma                 | astrocytoma                             |               | II/III | 20935218 |         | Deficient |
| ACH-000807 | <b>SNU-738</b>  | Oligodendroglioma      | oligodendroglioma                       |               | II/III |          | 0.084   | Deficient |
| ACH-000437 | <b>SW 1088</b>  | Astrocytoma            | astrocytoma                             |               | II/III | ***      |         | Deficient |
| ACH-000592 | <b>TM-31</b>    | Glioma                 | astrocytoma                             |               | II/III |          | 0.014   | Deficient |
| ACH-000232 | <b>U-251 MG</b> | Astrocytoma            | astrocytoma                             |               | II/III | 22986464 |         | Deficient |
| ACH-000126 | <b>KG-1-C</b>   | Oligodendroglioma      | oligodendroglioma                       |               | II/III |          | 4.084   | Positive  |
| ACH-000591 | <b>LN235</b>    | Astrocytoma            | astrocytoma                             |               | II/III | 30140041 |         | Positive  |
| ACH-000040 | <b>U-118 MG</b> | Astrocytoma            | astrocytoma                             |               | II/III | 26110872 | 1.655   | Positive  |
| ACH-001000 | 1321N1          | Astrocytoma            | astrocytoma                             |               | II/III |          | No data |           |
| ACH-001118 | M059J           | Glioma                 | astrocytoma                             |               | II/III |          | No data |           |
| ACH-001198 | SNB19           | Glioblastoma           | astrocytoma                             |               | II/III | 34201219 | No data | Deficient |
| ACH-001214 | U138MG          | Glioma                 | astrocytoma                             |               | II/III | 20935218 | No data | Positive  |
| ACH-002304 | SK-MG-1         | Astrocytoma            | astrocytoma                             |               | II/III |          | No data |           |
| ACH-000328 | LN-215          | Glioblastoma           | astrocytoma                             | Misidentified | II/III |          | 0.029   | Deficient |
| ACH-002269 | LN2TA3WT4       | Astrocytoma            | astrocytoma                             | Contaminated  | II/III |          |         |           |
| ACH-000208 | U-178           | Glioblastoma           | astrocytoma                             | Contaminated  | II/III |          | 0.070   | Deficient |
| ACH-000329 | CCF-STTG1       | Astrocytoma            | astrocytoma                             | Contaminated  | II/III | ***      |         | Deficient |
| ACH-000760 | LNZ308          | Glioblastoma           | astrocytoma                             | Contaminated  | II/III |          | 0.014   | Deficient |
| DepMap_ID  | Cell line_Name  | Tissue_Type DepMap     | Tissue_Type Cellosaurus                 |               |        |          |         |           |
| ACH-000064 | SALE            | lung                   | lung                                    |               | Normal |          | 2.949   |           |
| ACH-000170 | PrEC LH         | prostate               | prostate epithelial cells               |               | Normal |          | 2.842   |           |
| ACH-000494 | OELE            | ovary                  | ovary                                   |               | Normal |          | 3.793   |           |
| ACH-000642 | HMEL            | breast                 | breast                                  |               | Normal |          | 0.722   |           |
| ACH-001142 | NHAHTDD         | central_nervous_system | central_nervous_system Epithelial cells |               | Normal |          | 2.753   |           |
| ACH-001207 | TIG-3 TD        | fibroblast             | lung fibroblast                         |               | Normal |          | 4.184   |           |
| ACH-001310 | HA1E            | kidney                 | kidney epithelial cells                 |               | Normal |          | 3.353   |           |
| ACH-002463 | RPE1-ss77       | eye                    | Retinal pigment epithelial cell         |               | Normal |          | 0.000   |           |

#### Notes:

\*Determination of MGMT status:

1. Search literature and record MGMT status based on immunoblotting or sequencing of MGMT promoter methylation.
2. MGMT RNAseq data from DepMap: < 0.5, MGMT-deficient; >0.5, MGMT-positive.
3. MGMT-deficient is defined as methylated MGMT promoter and/or low levels of MGMT mRNAs or proteins.
4. MGMT-positive is defined as unmethylated MGMT promoter and high levels of MGMT mRNAs or proteins.

\*\*Exclusion of cell lines:

1. No RNAseq or other data available at DepMap.
2. Misidentified or contaminated as noted in Cellosaurus.

\*\*\*Citation of MGMT status in SW 1088 or CCF-STTG1:

<https://slidetodoc.com/oncology-nursing-2016-temozolomide-resistance-in-glioblastoma-multiforme/>

DepMap glioma cell lines used in this study are in bold.

**Table S2. Immunohistochemical staining of gliomas, related to Figure 1.**

| Patient ID | Gender | Age | Tumor Grade | p110 $\alpha$<br>(HPA0099 85) | p110 $\beta$<br>(CAB031 938) | p110 $\delta$<br>(CAB0154 20) | p110 $\gamma$<br>(HPA0699 76) | PTEN<br>(HPA03 1335) | MGMT<br>(HPA06 9497) |
|------------|--------|-----|-------------|-------------------------------|------------------------------|-------------------------------|-------------------------------|----------------------|----------------------|
| 3          | Male   | 68  | HGG         |                               |                              |                               | ND (0%)                       |                      | Low                  |
| 1537       | Male   | 77  | HGG         | ND (0%)                       |                              | ND (0%)                       |                               |                      |                      |
| 1587       | Female | 36  | HGG         | Low (25%)                     | Medium (75%)                 | ND (0%)                       | ND (0%)                       | Medium               | ND                   |
| 1608       | Male   | 79  | HGG         |                               |                              |                               | ND (0%)                       |                      | ND                   |
| 1627       | Male   | 33  | HGG         | Low (25%)                     |                              | ND (25%)                      |                               |                      |                      |
| 1644       | Female | 63  | HGG         |                               |                              |                               | ND (0%)                       |                      | ND                   |
| 2522       | Male   | 61  | HGG         |                               | Medium (75%)                 |                               |                               | ND                   |                      |
| 2527       | Male   | 72  | HGG         |                               | Medium (75%)                 |                               |                               |                      |                      |
| 2726       | Male   | 60  | HGG         | Medium (50%)                  |                              | ND (0%)                       |                               |                      |                      |
| 2728       | Female | 74  | HGG         |                               | Low (50%)                    |                               |                               | Low                  |                      |
| 2750       | Male   | 47  | HGG         | Low (25%)                     |                              | ND (25%)                      |                               |                      |                      |
| 2790       | Male   | 47  | HGG         |                               | Medium (75%)                 |                               |                               |                      |                      |
| 3091       | Male   | 71  | HGG         | High (75%)                    |                              | ND (25%)                      |                               |                      |                      |
| 3092       | Male   | 48  | HGG         | Low (25%)                     |                              | Low (50%)                     |                               |                      |                      |
| 3203       | Male   | 53  | HGG         |                               | Medium (75%)                 |                               |                               | Low                  |                      |
| 3226       | Male   | 56  | HGG         |                               | Medium (75%)                 |                               | ND (0%)                       |                      | ND                   |
| 3241       | Female | 58  | HGG         | Medium (25%)                  |                              | ND (25%)                      |                               |                      |                      |
| 5479       | Female | 71  | HGG         |                               |                              |                               | ND (0%)                       |                      | ND                   |
| 122        | Female | 32  | LGG         |                               |                              |                               | ND (0%)                       |                      | ND                   |
| 156        | Male   | 58  | LGG         |                               |                              | ND (0%)                       |                               |                      |                      |
| 1613       | Female | 39  | LGG         |                               | Medium (75%)                 |                               |                               |                      |                      |
| 2529       | Female | 37  | LGG         | ND (0%)                       |                              |                               |                               |                      |                      |
| 2634       | Female | 45  | LGG         |                               |                              |                               | ND (0%)                       |                      | ND                   |
| 2868       | Male   | 27  | LGG         |                               |                              |                               | ND (0%)                       |                      | ND                   |
| 2873       | Male   | 58  | LGG         |                               |                              |                               | ND (0%)                       |                      | Low                  |
| 3023       | Female | 1   | LGG         |                               | ND (0%)                      |                               |                               |                      |                      |
| 3120       | Male   | 38  | LGG         | Low (25%)                     |                              | ND (0%)                       |                               |                      |                      |
| 3137       | Male   | 77  | LGG         | Low (25%)                     |                              | ND (0%)                       |                               |                      |                      |
| 3174       | Female | 22  | LGG         | Low (50%)                     | Low (50%)                    | ND (0%)                       |                               | Low                  |                      |
| 3365       | Male   | 65  | LGG         |                               | Low (25%)                    |                               |                               | ND                   |                      |

**Notes:** Data were retrieved from THPA. Antibody catalog numbers starting with HPA or CAB and quantities of each staining are included. HGG: high-grade glioma (grade III/IV); LGG: low-grade glioma (grade I/II). ND: not detected.

**Table S3. IC50s and AUCs of GBM cell lines, related to Figure 2.**

| Cell_Line | Grade  | MGMT_Status | IC50s_of_TMZ ( $\mu$ M) | Log10IC50s | Source       |
|-----------|--------|-------------|-------------------------|------------|--------------|
| 42-MG-BA  | IV     | Deficient   | 123.755                 | 2.093      | Sanger GDSC1 |
| A-172     | IV     | Deficient   | 669.400                 | 2.826      | Sheng lab    |
| AM-38     | IV     | Deficient   | 260.073                 | 2.415      | Sanger GDSC1 |
| CAS-1     | IV     | Deficient   | 649.190                 | 2.812      | Sanger GDSC1 |
| DK-MG     | IV     | Deficient   | 560.638                 | 2.749      | Sanger GDSC1 |
| GB-1      | IV     | Deficient   | 141.686                 | 2.151      | Sanger GDSC1 |
| GI-1      | IV     | Deficient   | 41.641                  | 1.620      | Sanger GDSC1 |
| KS-1      | IV     | Deficient   | 140.676                 | 2.148      | Sanger GDSC1 |
| LN-229    | IV     | Deficient   | 612.900                 | 2.787      | Sheng lab    |
| SF-295    | IV     | Deficient   | 930.800                 | 2.969      | Sheng lab    |
| SF126     | IV     | Deficient   | 276.365                 | 2.441      | Sanger GDSC1 |
| SF539     | IV     | Deficient   | 91.228                  | 1.960      | Sanger GDSC1 |
| SNB75     | IV     | Deficient   | 684.412                 | 2.835      | Sanger GDSC1 |
| U-87 MG   | IV     | Deficient   | 2297.000                | 3.361      | Sheng lab    |
| GAMG      | IV     | Positive    | 304.115                 | 2.483      | Sanger GDSC1 |
| KALS-1    | IV     | Positive    | 388.582                 | 2.589      | Sanger GDSC1 |
| LN-18     | IV     | Positive    | 5819.000                | 3.765      | Sheng lab    |
| no.10     | IV     | Positive    | 374.870                 | 2.574      | Sanger GDSC1 |
| T98G      | IV     | Positive    | 1048.000                | 3.020      | Sheng lab    |
| YH-13     | IV     | Positive    | 342.779                 | 2.535      | Sanger GDSC1 |
| YKG1      | IV     | Positive    | 358.998                 | 2.555      | Sanger GDSC1 |
| 8-MG-BA   | II/III | Deficient   | 48.330                  | 1.684      | Sanger GDSC1 |
| Becker    | II/III | Deficient   | 206.917                 | 2.316      | Sanger GDSC1 |
| H4        | II/III | Deficient   | 213.604                 | 2.330      | Sanger GDSC1 |
| Hs 683    | II/III | Deficient   | 339.948                 | 2.531      | Sanger GDSC1 |
| NMC-G1    | II/III | Deficient   | 328.046                 | 2.516      | Sanger GDSC1 |
| SF268     | II/III | Deficient   | 328.700                 | 2.517      | Sheng lab    |
| SW 1088   | II/III | Deficient   | 172.264                 | 2.236      | Sanger GDSC1 |
| U-251 MG  | II/III | Deficient   | 151.000                 | 2.179      | Sheng lab    |
| U-118 MG  | II/III | Positive    | 776.085                 | 2.890      | Sanger GDSC1 |

**Notes:** MGMT status of cell lines was from Supplemental Table S1. TMZ IC50s were collected either from the DepMap Sanger GDSC1 dataset or acquired by the Sheng lab by measuring dose-dependent effect of TMZ in these cells.

**Table S4. Datasets used for survival analyses, related to Figure 3.**

| Datasets   | Primary/IDH-wt GII/III |               | Primary/IDH-wt GBM |               |
|------------|------------------------|---------------|--------------------|---------------|
|            | MGMT-deficient         | MGMT-positive | MGMT-deficient     | MGMT-positive |
| TCGA       | 4                      | 54            | 21                 | 29            |
| CGGA       | 8                      | 20            | 16                 | 17            |
| Gravendeel |                        |               | 13                 | 12            |
| Rembrandt  |                        |               | 17                 | 13            |
| LeeY       |                        |               | 27                 | 30            |
| Murat      |                        |               | 17                 | 0             |
| Ivy        |                        |               | 3                  | 0             |
| Grzmil     |                        |               | 2                  | 4             |
| Philips    |                        |               | 14                 | 14            |
| Vital      |                        |               | 7                  | 7             |
| Ducray     |                        |               | 2                  | 12            |
| Gorovets   | 3                      | 10            |                    |               |
| Kamoun     | 3                      | 9             |                    |               |
| POLA       | 0                      | 3             |                    |               |

**Notes:** Numbers of samples from the above datasets are shown.

**A**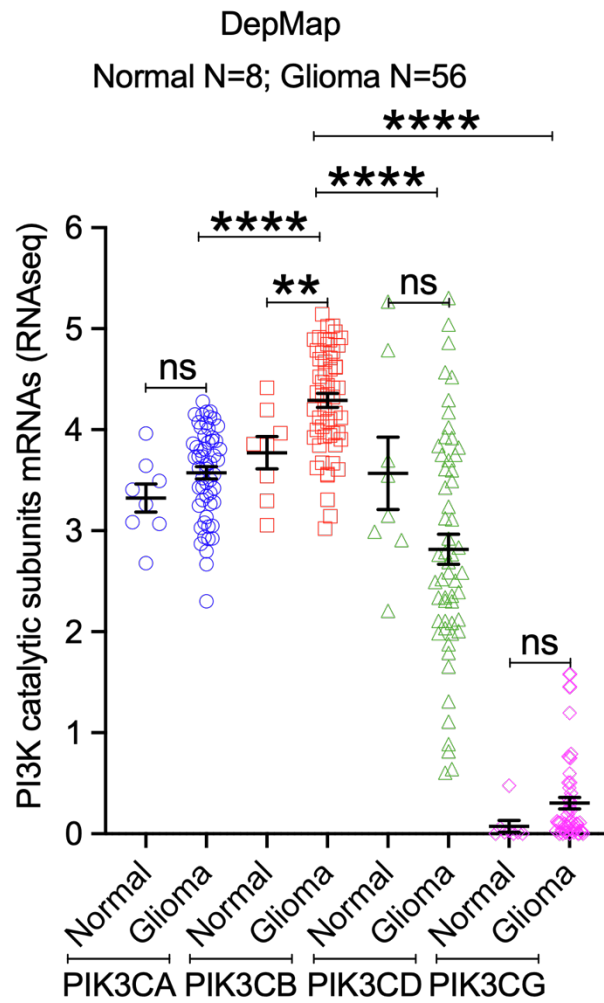**B**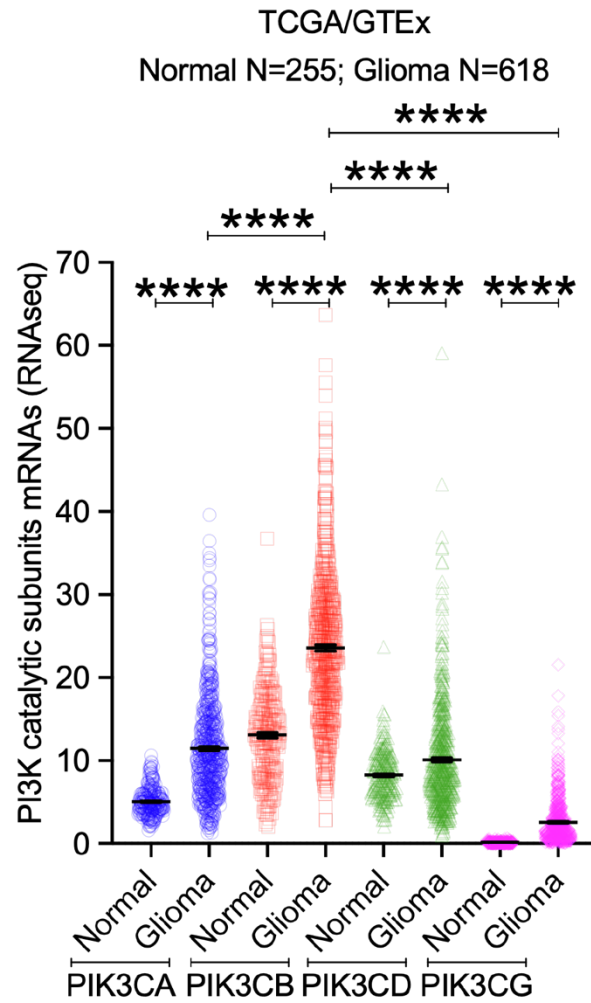

**Figure S1. Expression of PI3K kinases in normal tissues and gliomas, related to Figure 1.** RNAseq data were retrieved from DepMap, TCGA, and GTEx. **(A)** Comparison of PI3K mRNAs between DepMap normal cell lines (Normal) and glioma cell lines (Glioma). **(B)** Comparison of PI3K mRNAs between GTEx cerebral cortex (Normal) and TCGA gliomas (Glioma). Error bars are standard errors. Student *t*-test or one-way ANOVA was used to determine statistical significance. Sample sizes (N) of each group are shown. ns: not significant; \*\*:  $P < 0.01$ ; \*\*\*\*:  $P < 0.0001$ .

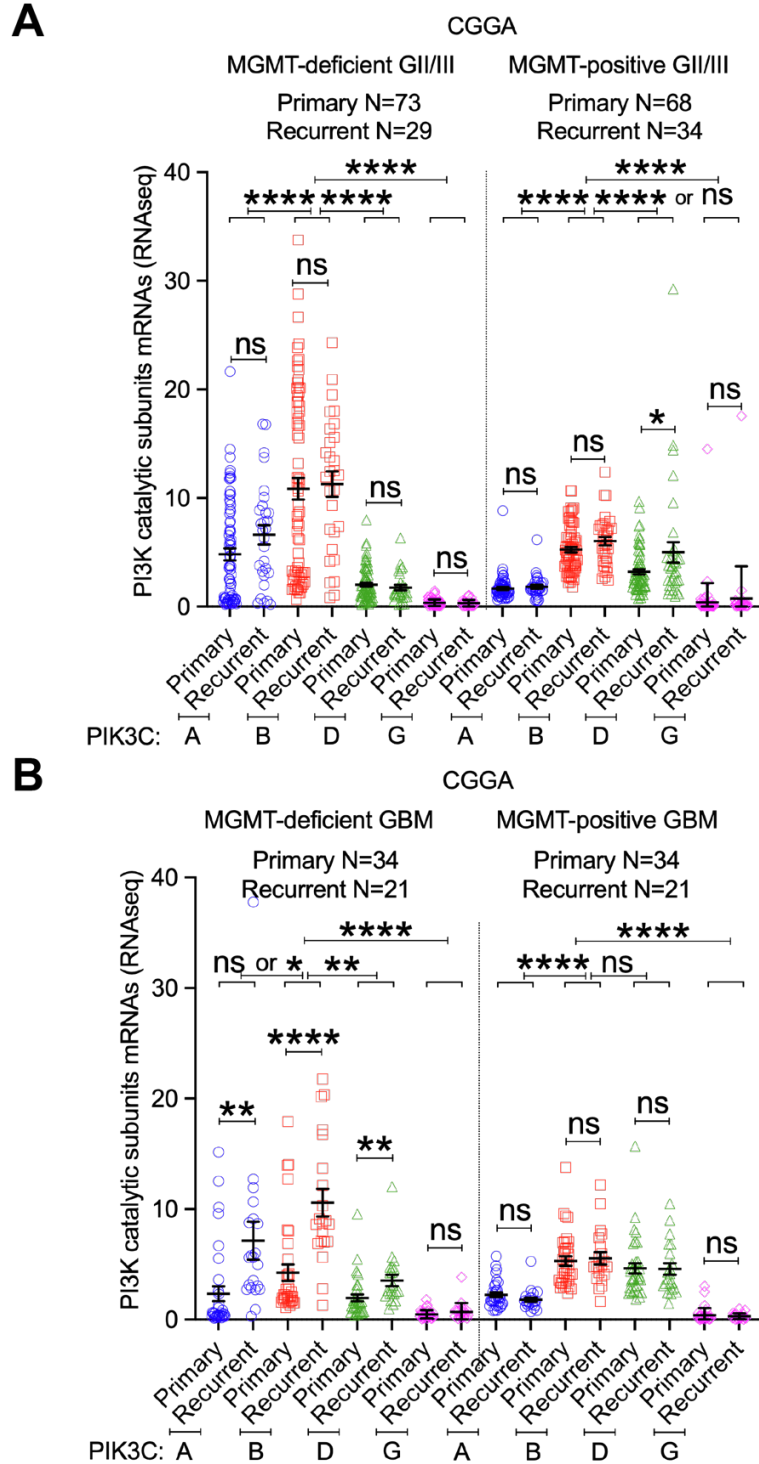

**Figure S2. Expression of PI3K kinases in primary and recurrent gliomas, related to Figure 1.** RNAseq data were retrieved from CGGA. mRNA levels of PI3K kinases in primary or recurrent grade II/III (GII/III) glioma (**A**) or grade IV GBM (**B**) are shown. Their levels were also compared in MGMT-deficient or MGMT-positive gliomas. Sample sizes (N) are shown. Error bars are standard errors. Student *t*-test or one-way ANOVA was used to determine statistical significance. ns: not significant; \*,  $P < 0.05$ ; \*\*,  $P < 0.01$ ; \*\*\*\*,  $P < 0.0001$ .

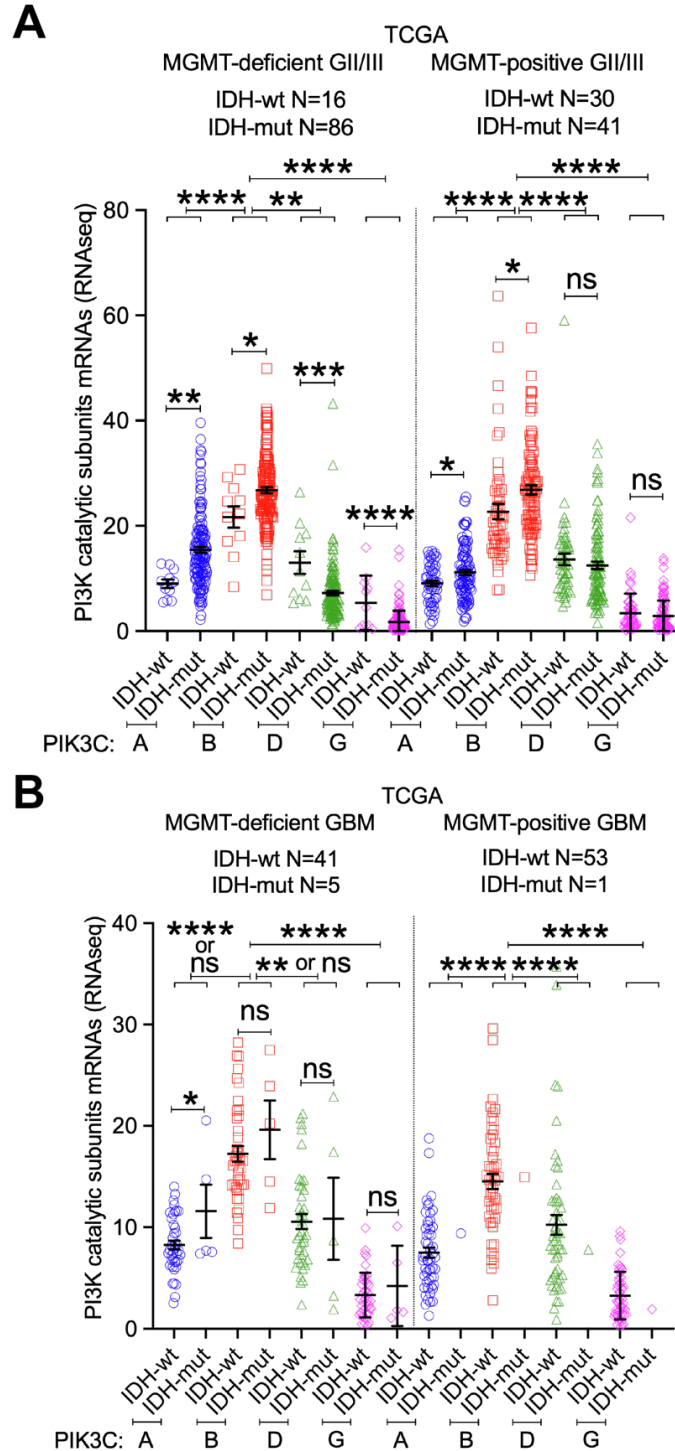

**Figure S3. Expression of PI3K kinases in IDH wild-type or mutant gliomas, related to Figure 1.** RNAseq data were retrieved from TCGA. mRNA levels of PI3K kinases in IDH wild-type (wt) or IDH mutant (mut) grade II/III (GII/III) glioma (**A**) or grade IV GBM (**B**) are shown. Their levels were also compared in MGMT-deficient or MGMT-positive gliomas. Sample sizes (N) are shown. Error bars are standard errors. Student *t*-test or one-way ANOVA was used to determine statistical significance. ns: not significant; \*:  $P < 0.05$ ; \*\*:  $P < 0.01$ ; \*\*\*:  $P < 0.0001$ .

**A**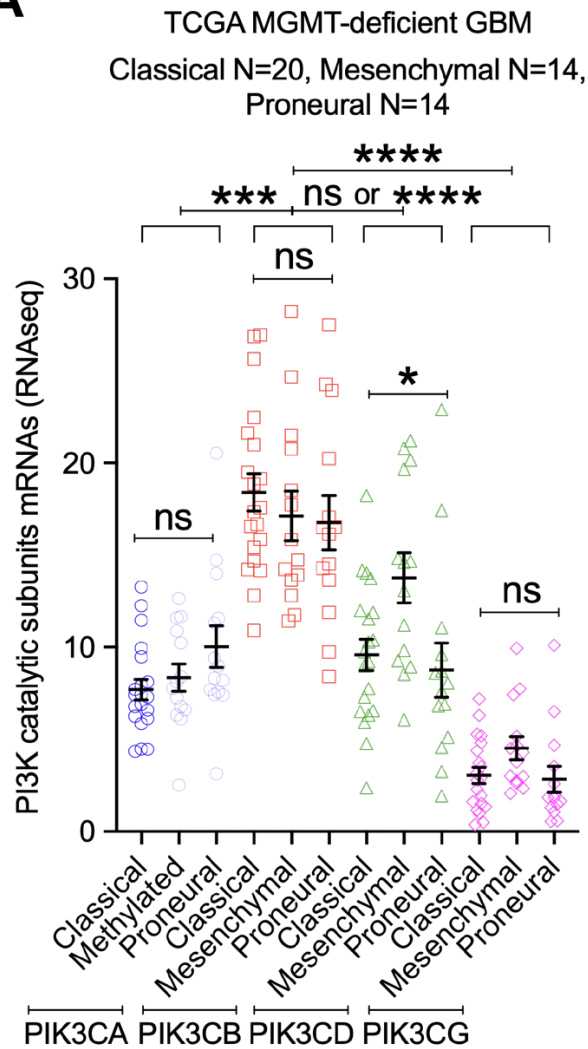**B**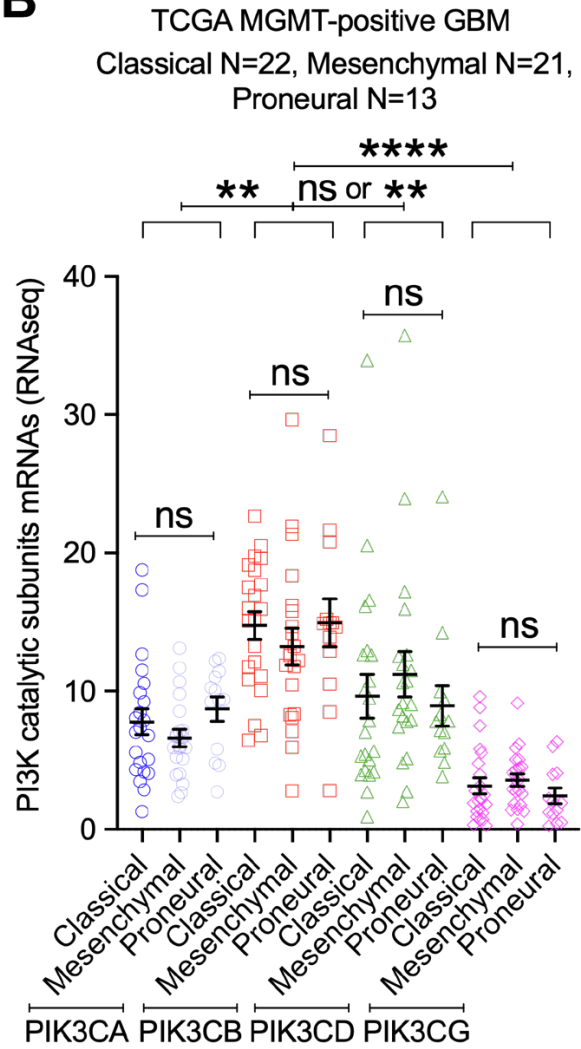

**Figure S4. Expression of PI3K kinases in GBM subtypes, related to Figure 1.** RNAseq data were retrieved from TCGA. mRNA levels of PI3K kinases in classical, mesenchymal, or proneural subtype in MGMT-deficient GBM (**A**) or MGMT-positive GBM (**B**) are shown. Sample sizes (N) are shown. Error bars are standard errors. Student *t*-test or one-way ANOVA was used to determine statistical significance. ns: not significant; \*:  $P < 0.05$ ; \*\*:  $P < 0.01$ ; \*\*\*:  $P < 0.001$ ; \*\*\*\*:  $P < 0.0001$ .

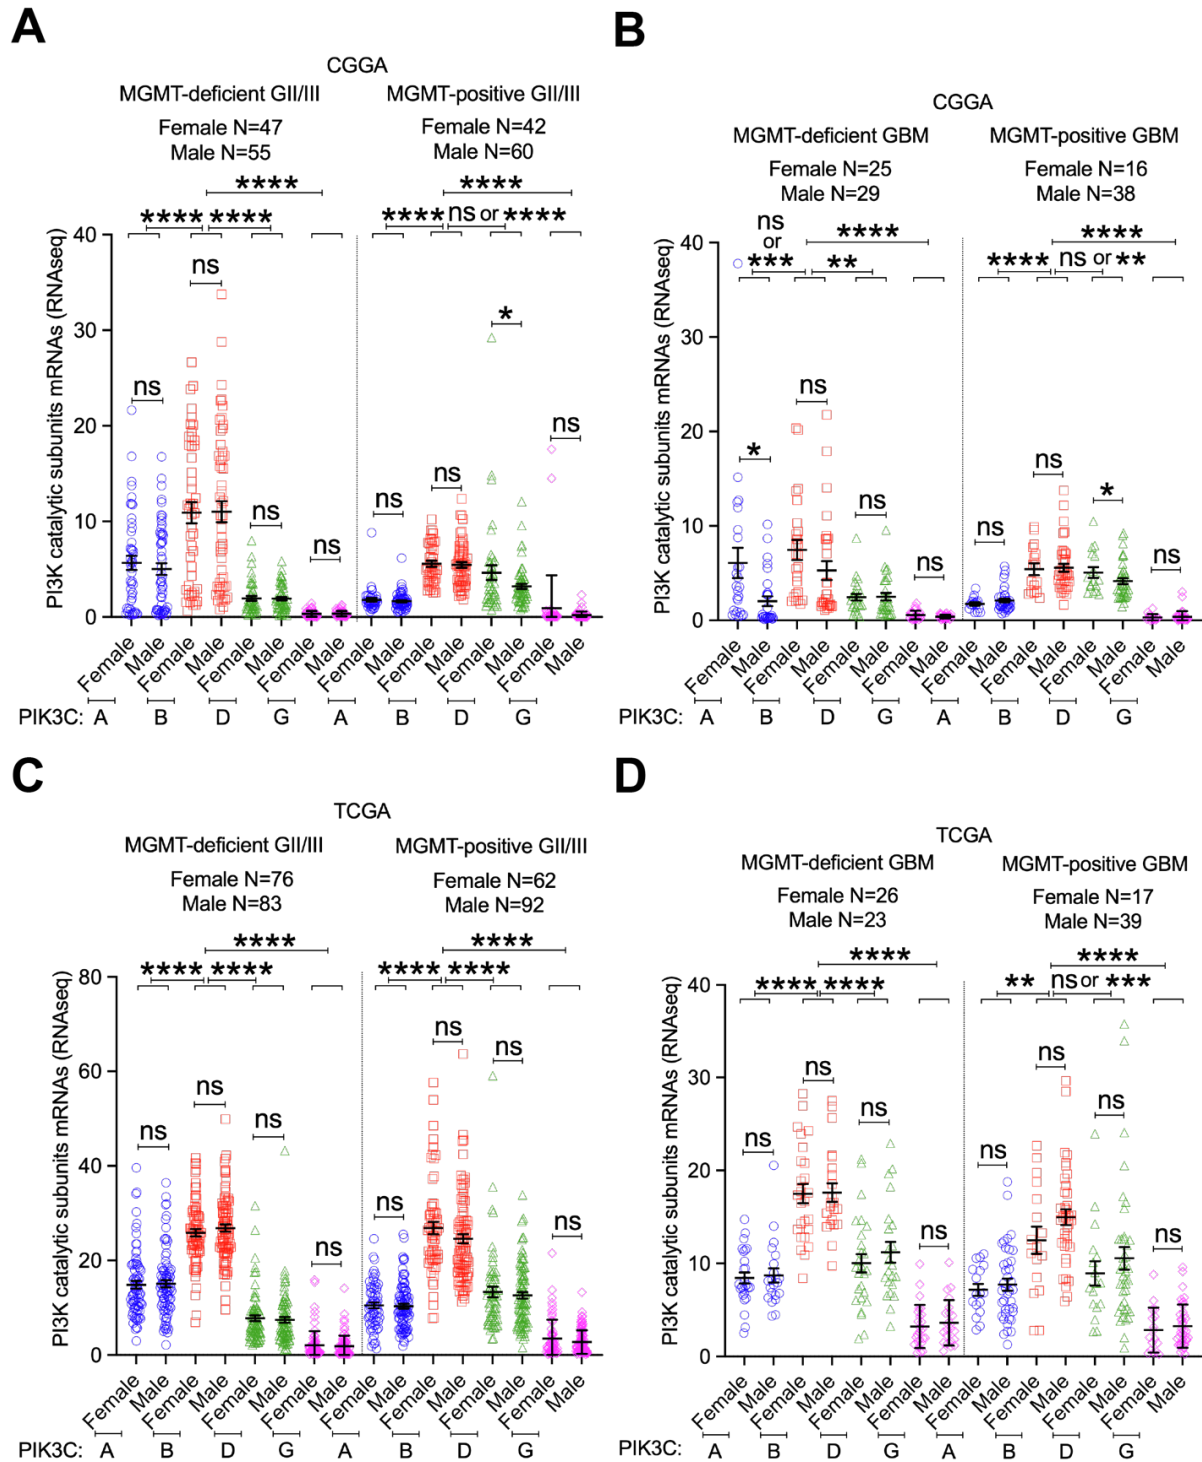

**Figure S5. Gender difference in the expression of PI3K kinases, related to Figure 1.** RNAseq data were retrieved from CGGA (A and B) or TCGA (C and D). mRNA levels of PI3K kinases in female or male grade II/III (GII/III) MGMT-deficient glioma (A and C) or MGMT-positive glioma (B and D). Sample sizes (N) are shown. Error bars are standard errors. Student *t*-test or one-way ANOVA was used to determine statistical significance. ns: not significant; \*:  $P < 0.05$ ; \*\*:  $P < 0.01$ ; \*\*\*:  $P < 0.001$ ; \*\*\*\*:  $P < 0.0001$ .



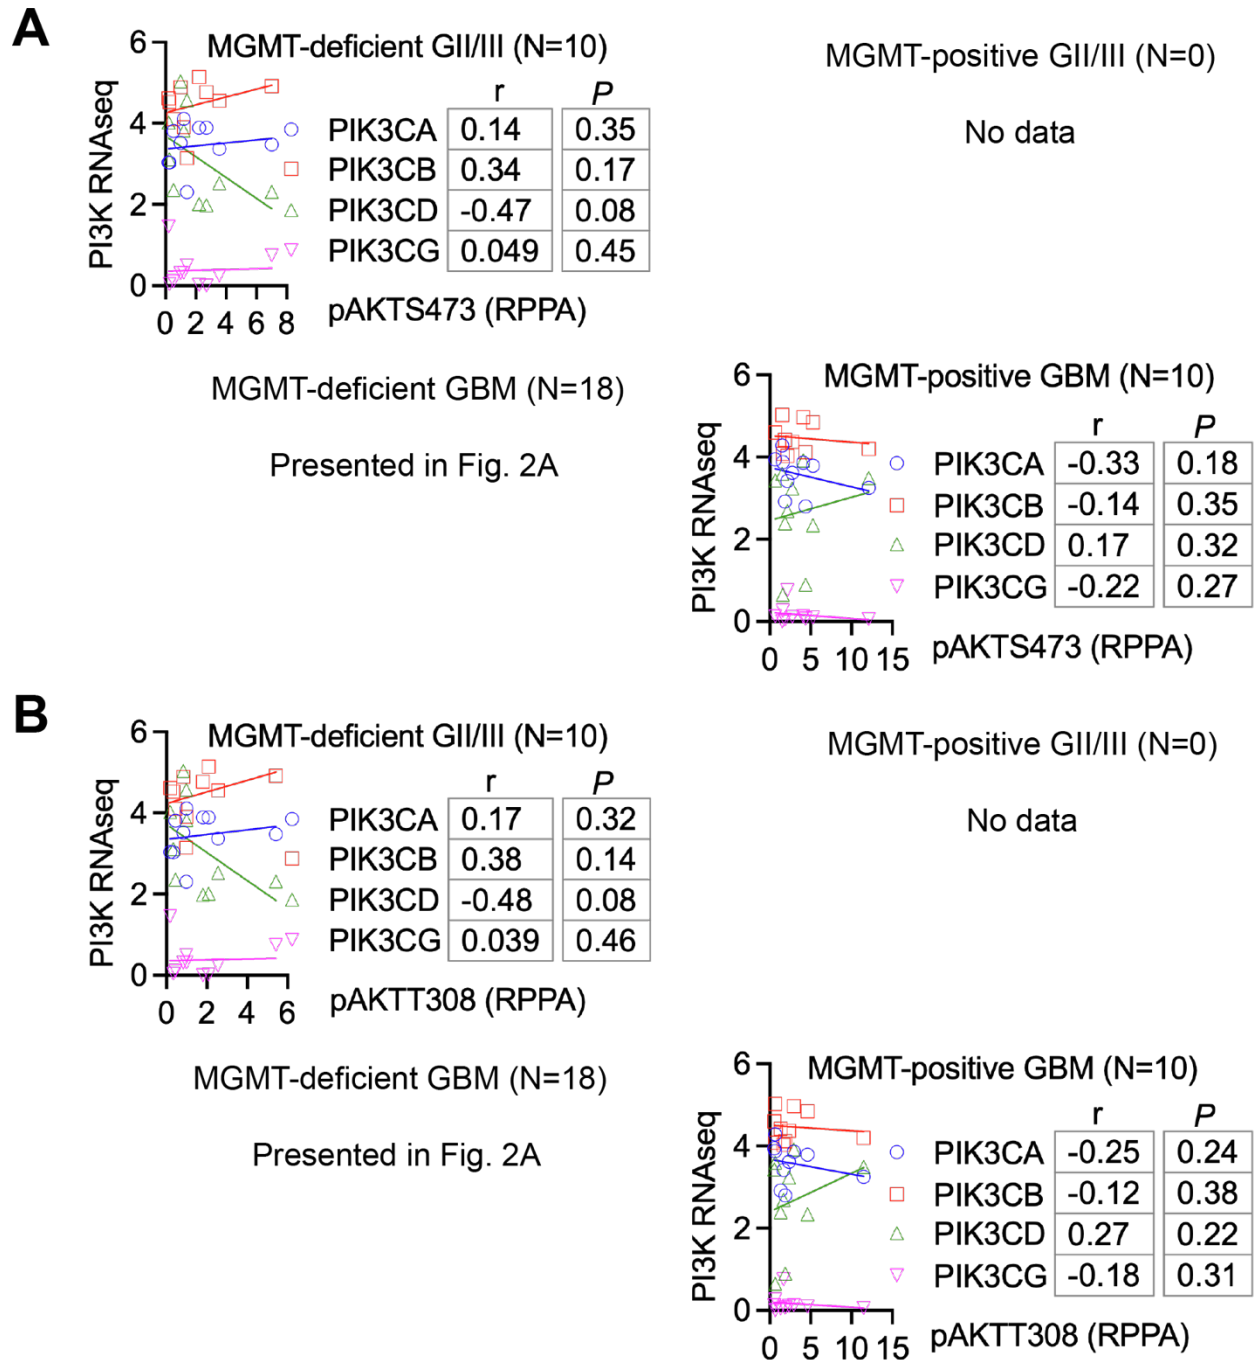

**Figure S7. Correlation between PI3K mRNAs and pAKTS473/T308 in DepMap glioma cell lines, related to Figure 2.** RNAseq or reverse phase protein array (RPPA) data were retrieved from DepMap. **(A)** Pearson correlation between PI3K mRNAs and pAKTS473 in DepMap MGMT-deficient or MGMT-positive grade II/III (GII/III) cell lines or GBM cell lines. **(B)** Pearson correlation between PI3K mRNAs and pAKTT308 in DepMap MGMT-deficient or MGMT-positive grade II/III (GII/III) cell lines or GBM cell lines. Prism 10 was used to determine Pearson coefficients. Protein levels of pAKTS473/T308 were normalized by those of total AKT and beta-actin. Pearson correlation coefficient  $r$  and  $P$  values as well as case numbers ( $N$ ) are shown. Results in MGMT-deficient GBMs are shown in Figure 2A. No MGMT-positive GII/III cell lines were found in DepMap.

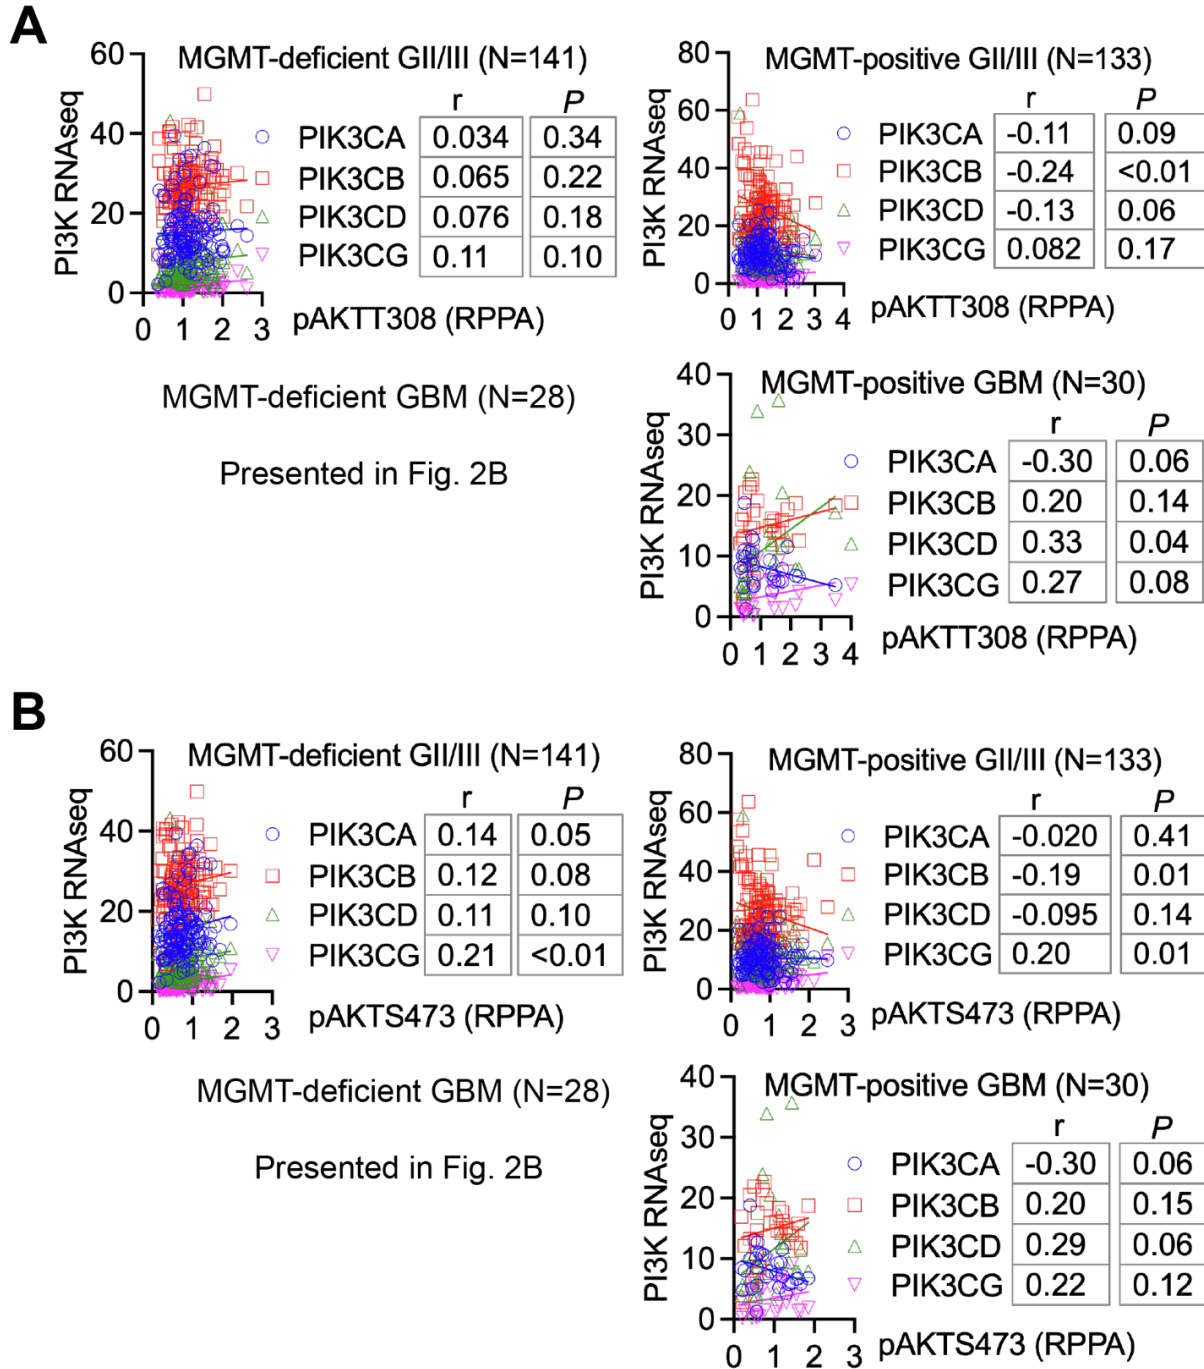

**Figure S8. Correlation between PI3K mRNAs and pAKTS473/T308 in TCGA glioma specimens, related to Figure 2.** RNAseq or reverse phase protein array (RPPA) data were retrieved from TCGA. **(A)** Pearson correlation between PI3K mRNAs and pAKTS473 in TCGA MGMT-deficient or MGMT-positive grade II/III (GII/III) specimens or GBM specimens. **(B)** Pearson correlation between PI3K mRNAs and pAKTT308 in TCGA MGMT-deficient or MGMT-positive grade II/III (GII/III) tumors or GBM tumors. Prism 10 was used to determine Pearson coefficients. Protein levels of pAKTS473/T308 were normalized by those of total AKT and beta-actin. Pearson correlation coefficient  $r$  and  $P$  values as well as case numbers ( $N$ ) are shown. Results in MGMT-deficient GBMs are shown in Figure 2B.

## A DepMap

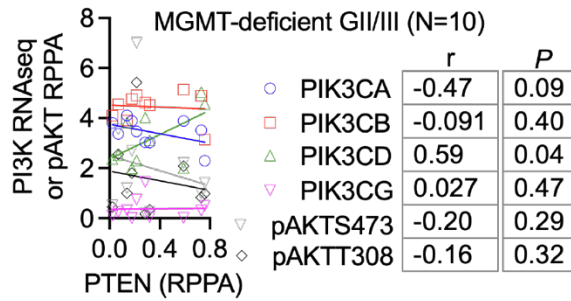

MGMT-positive GII/III (N=0)

No data

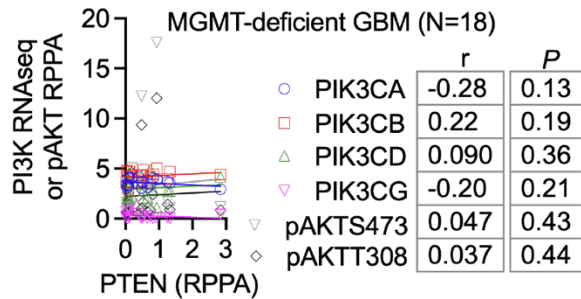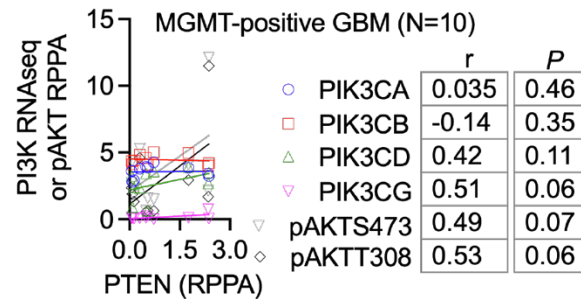

## B TCGA

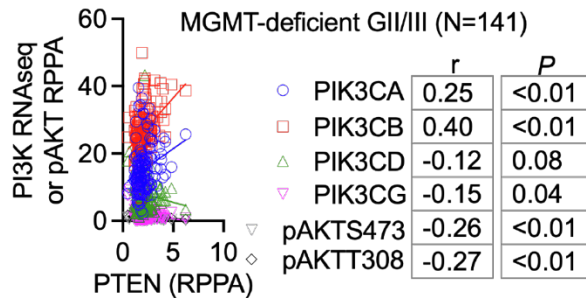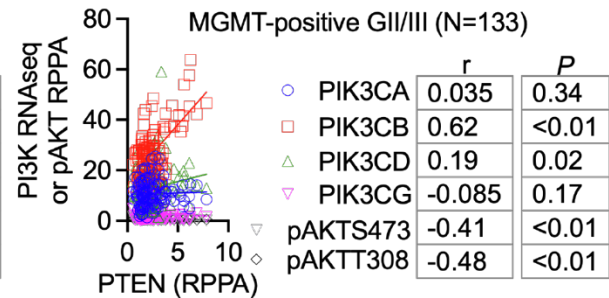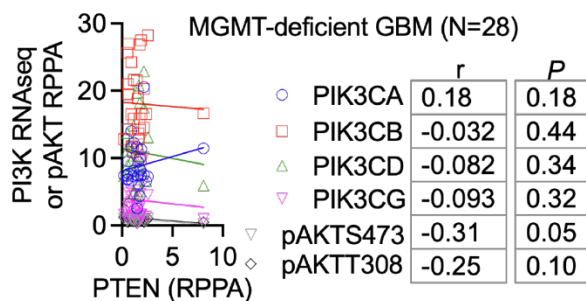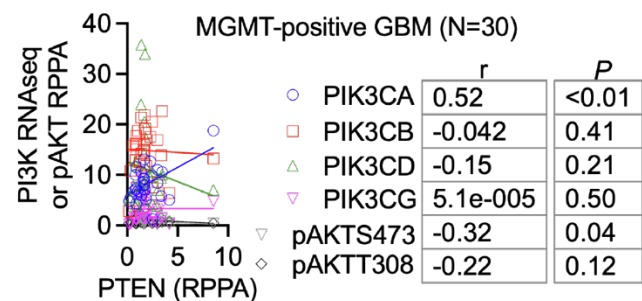

**Figure S9. Correlation between PTEN proteins and PI3K mRNAs or AKTS473/T308, related to Figure 2.** RNAseq or RPPA Data were retrieved from DepMap or TCGA. **(A)** Pearson correlation between PTEN proteins and PI3K mRNAs or pAKTS473/T308 in DepMap MGMT-deficient or MGMT-positive grade II/III (GII/III) cell lines or GBM cell lines. **(B)** Pearson correlation between PTEN proteins and PI3K mRNAs or pAKTS473/T308 in TCGA MGMT-deficient or MGMT-positive grade II/III (GII/III) tumors or GBM tumors. Prism 10 was used to determine Pearson coefficients. Protein levels of pAKTS473/T308 were normalized by those of total AKT and beta-actin. Pearson correlation coefficient *r* and *P* values as well as case numbers (*N*) are shown.

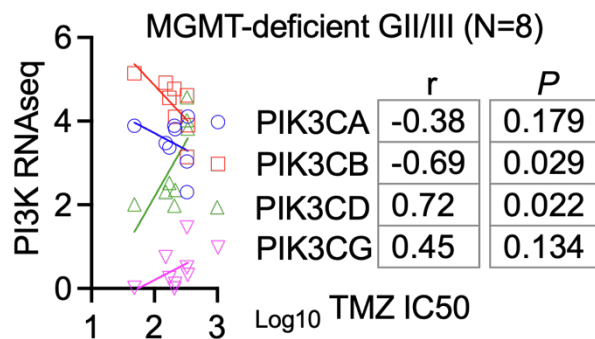

MGMT-positive GII/III (N=1)

No Data

MGMT-deficient GBM (N=14)

Presented in Fig. 2C

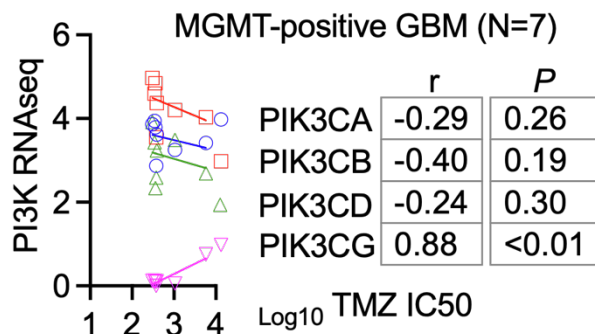

**Figure S10. Correlation between TMZ IC50s and PI3K mRNAs, related to Figure 2.** RNAseq or TMZ IC50 Data were retrieved from DepMap or acquired from the Sheng lab. Pearson correlations between TMZ IC50s and PI3K mRNAs in DepMap MGMT-deficient or MGMT-positive grade II/III (GII/III) cell lines or GBM cell lines were determined using Prism 10. Pearson correlation coefficient *r* and *P* values as well as case numbers (N) are shown. Results in MGMT-deficient GBMs are shown in Figure 2C.

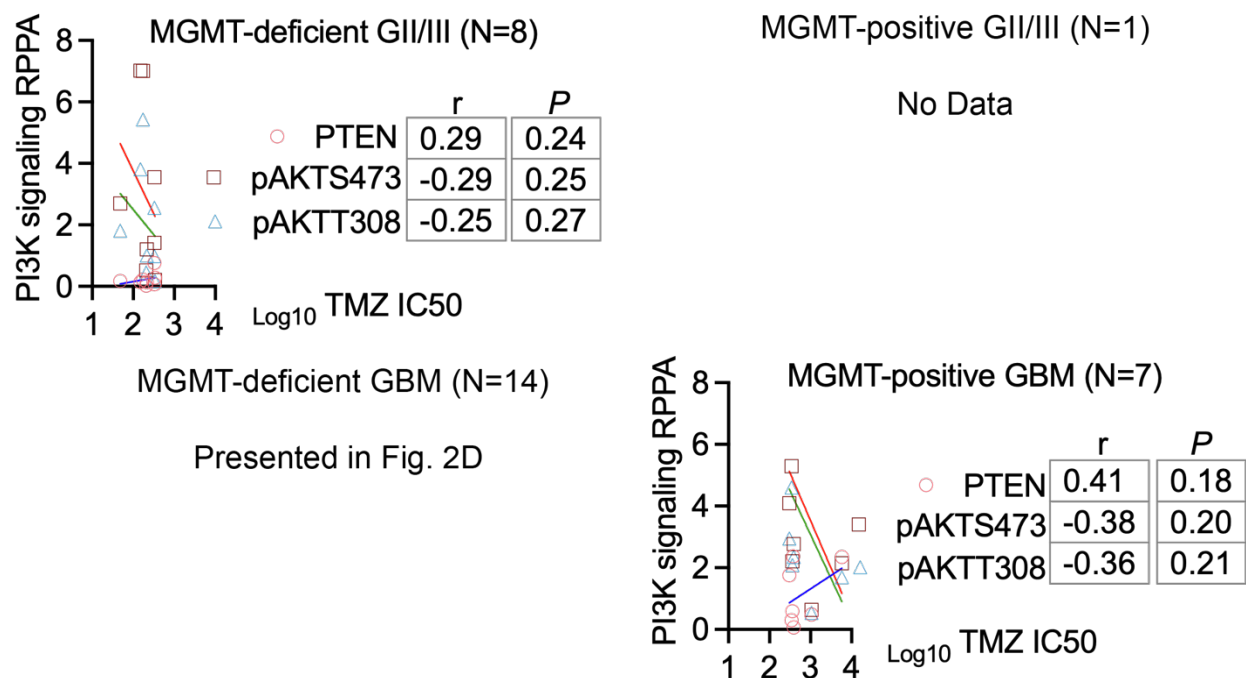

**Figure S11. Correlation between TMZ IC50s and pAKTS473/T308 or PTEN, related to Figure 2.** RPPA or TMZ IC50 Data were retrieved from DepMap or acquired from the Sheng lab. Pearson correlations between TMZ IC50s and pAKTS473/T308 or PTEN in DepMap MGMT-deficient or MGMT-positive grade II/III (GII/III) cell lines or GBM cell lines were determined using Prism 10. Pearson correlation coefficient *r* and *P* values as well as case numbers (N) are shown. Protein levels of pAKTS473/T308 were normalized by those of total AKT and beta-actin. Results in MGMT-deficient GBMs are shown in Figure 2D.

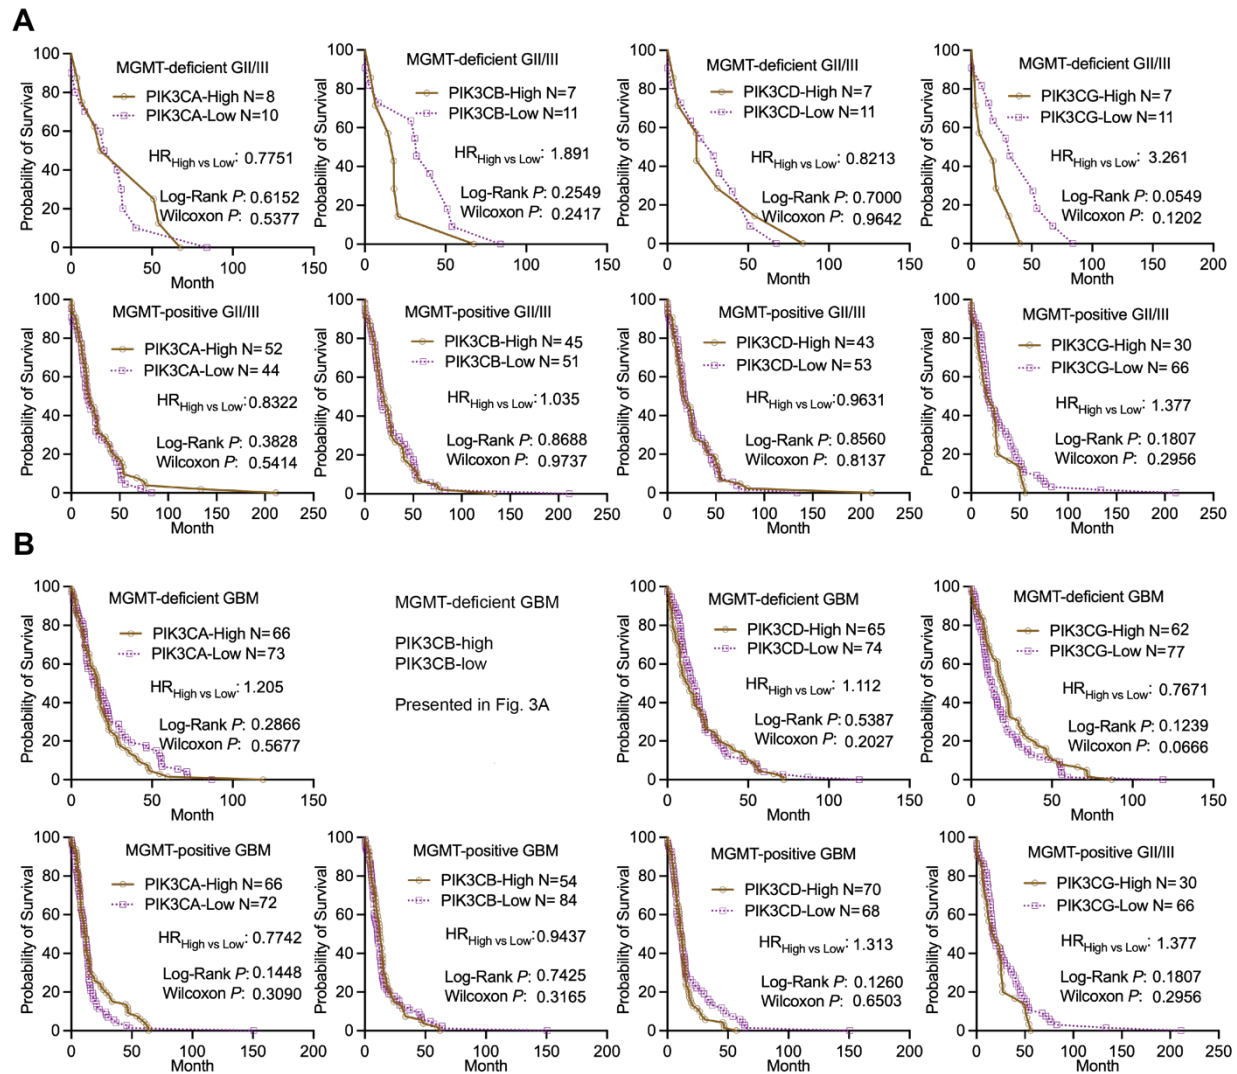

**Figure S12. Survival analyses of PI3K kinases in IDH-wt gliomas, related to Figure 3.** RNAseq and associated clinical data were retrieved from TCGA and CGGA. Additional datasets (e.g., Rembrandt, Murat, Ducay, LeeY Gravendeel, Ivy, Gorovets, Grzmil, Kamoun, Philips, POLA, and Vital) were downloaded from the Gliovis program ([heep://gliovis.bioinfo.cnio.es](http://heep://gliovis.bioinfo.cnio.es)). Primary gliomas with wild-type isocitrate dehydrogenase (IDH-wt) were included in the analysis, whereas recurrent gliomas or gliomas with mutant IDH were excluded. Kaplan-Meier analysis was performed in MGMT-deficient or MGMT-positive grade II/III (GII/III) glioma (**A**) and GBM (**B**) by comparing the survival of patients with high or low levels of PI3K kinases. Hazard ratios (HRs) of patients with high levels over those with low levels of PI3K genes (high vs low), case numbers (N), Log-Rank *P* values, and Wilcoxon *P* values are shown. Results in MGMT-deficient GBMs are shown in Figure 3A.

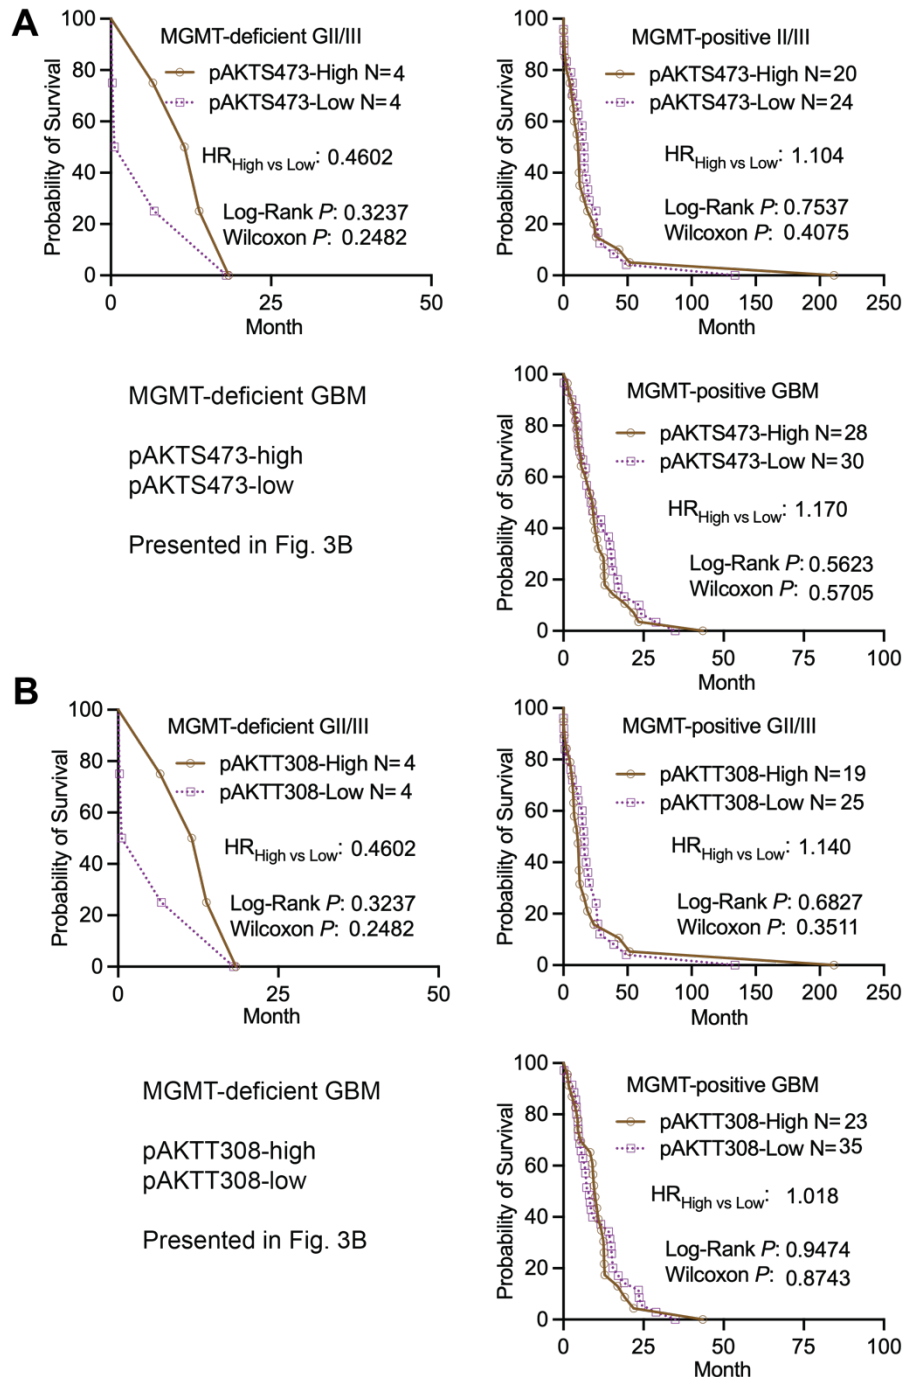

**Figure S13. Survival analyses of pAKTS473 and pAKTT308 in IDH-wt gliomas, related to Figure 3.** RPPA and associated clinical data were retrieved from TCGA and CGGA. Primary gliomas with IDH-wt were included in the analysis. Recurrent gliomas or gliomas with IDH-mut were excluded. Kaplan-Meier analysis was performed in MGMT-deficient or MGMT-positive grade II/III (GII/III) glioma and GBM by comparing the survival of patients with high or low levels of pAKTS473 (A) or pAKTT308 (B). Hazard ratios (HRs) of patients with high levels of pAKTS473/T308 over those with low levels of pAKTS473/T308 (high vs low), case numbers (N), Log-Rank  $P$  values, and Wilcoxon  $P$  values are shown. Results in MGMT-deficient GBMs are shown in Figure 3B.

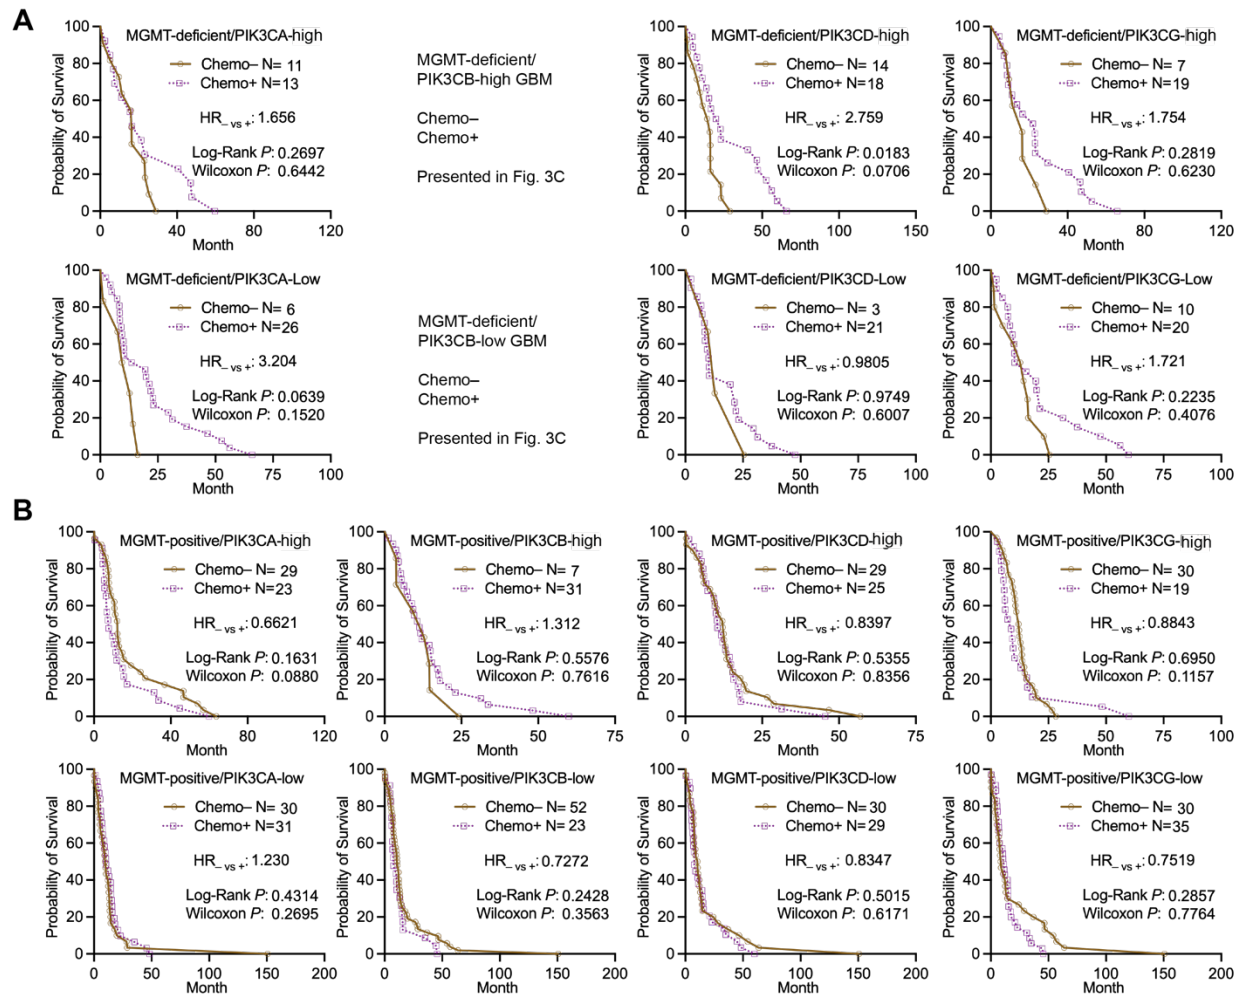

**Figure S14. Survival analyses of gliomas treated with or without chemotherapy, related to Figure 3.** RNAseq and associated clinical data were retrieved from TCGA and CGGA. IDH-wt primary GBMs treated with or without chemotherapy were included in the analysis. Kaplan-Meier analysis was performed in MGMT-deficient (**A**) or MGMT-positive (**B**) GBMs by comparing the survival of patients treated with or without chemo. Hazard ratios (HRs) of patients receiving no treatment (Chemo-) or treated with chemotherapy (Chemo+) (- vs +), case numbers (N), Log-Rank *P* values, and Wilcoxon *P* values are shown. Results in MGMT-deficient GBMs are shown in Figure 3C.

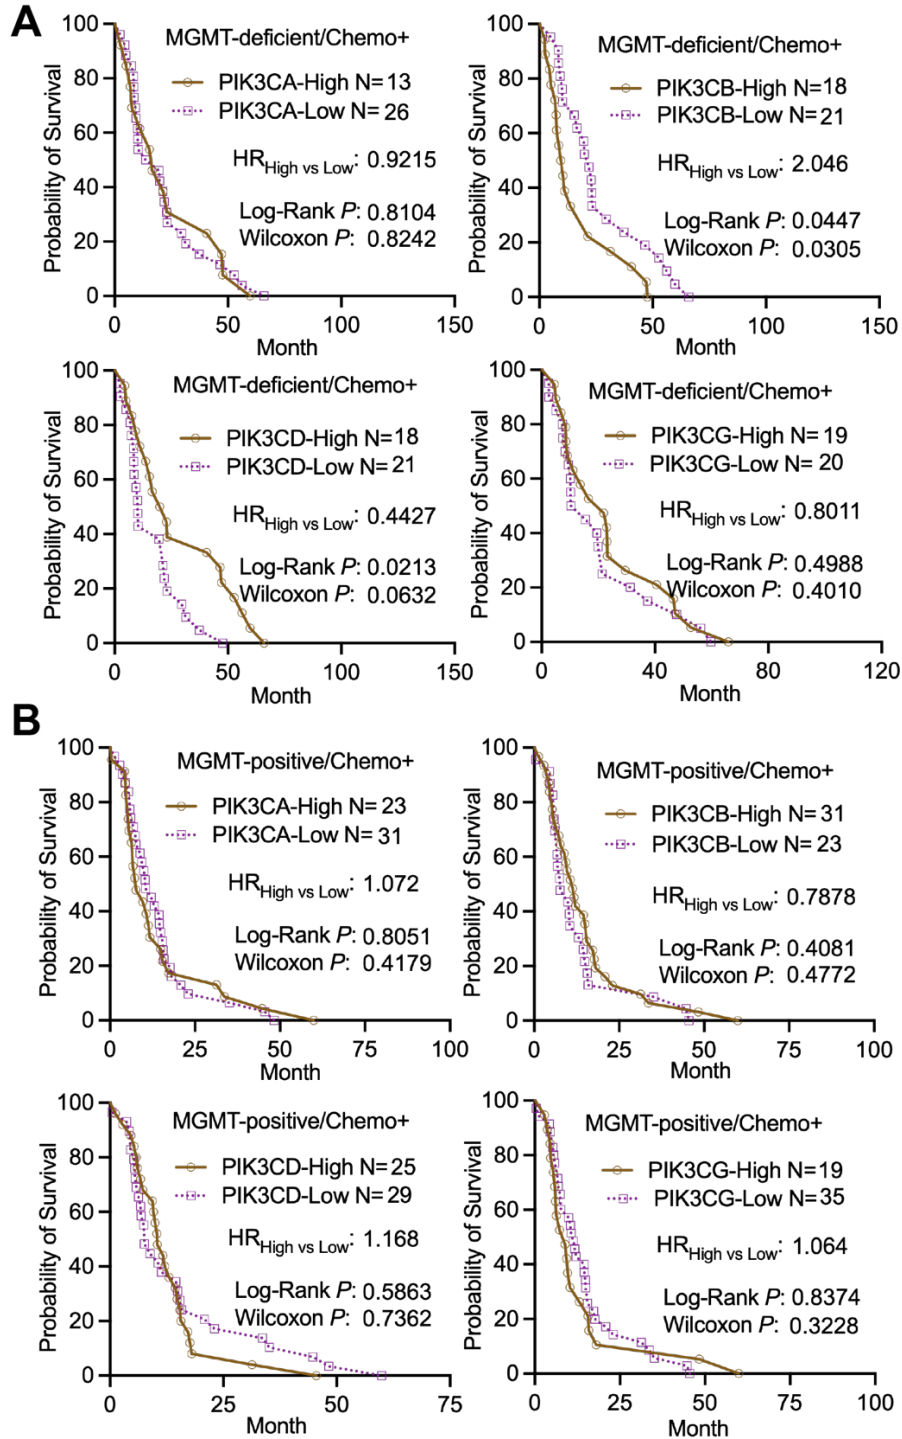

**Figure S15. Survival analyses of chemotherapy-treated GBM patients expressing with high or low levels of PI3K kinases, related to Figure 3.** RNAseq and associated clinical data were retrieved from TCGA and CGGA. IDH-wt primary GBMs treated with chemotherapy (Chemo+) were included in the analysis. Kaplan-Meier analysis was performed in MGMT-deficient (**A**) or MGMT-positive (**B**) GBMs by comparing the survival of patients with high or low levels of PI3K kinases. Hazard ratios (HRs) of patients with high levels to those with low levels of PI3K genes (high vs low), case numbers (N), Log-Rank *P* values, and Wilcoxon *P* values are shown.

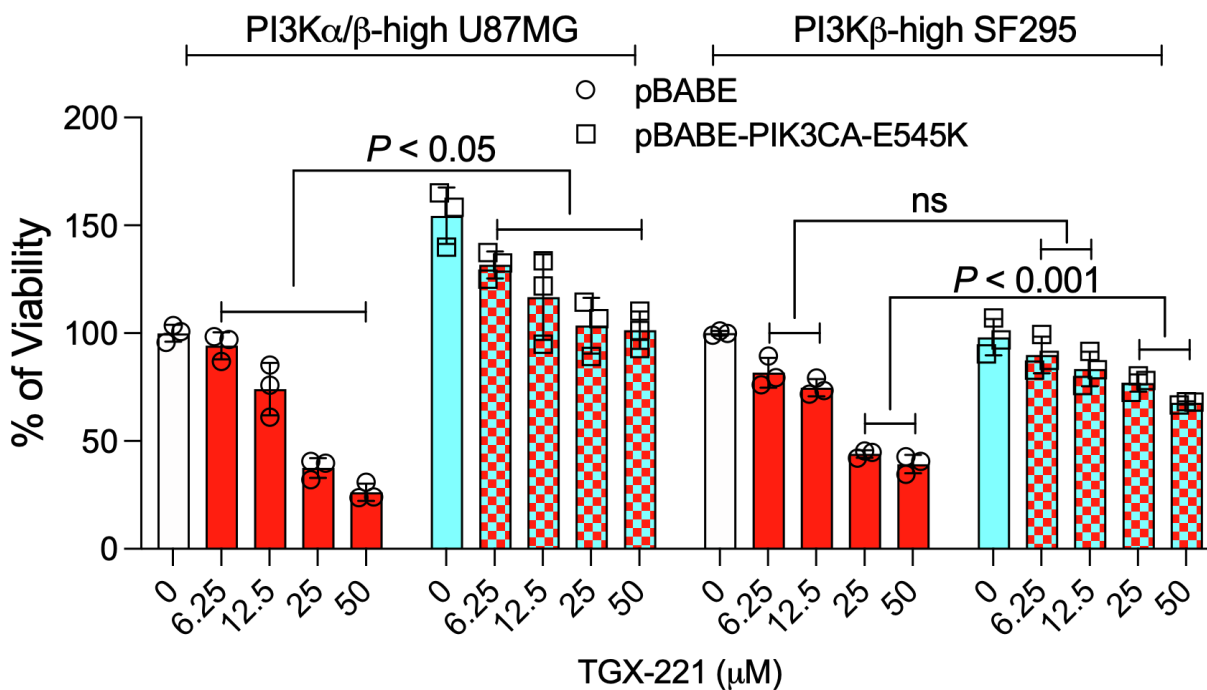

**Figure S16. Overexpression of PIK3CA-E545K antagonizes growth inhibition caused by TGX-221, related to Figure 4.** PI3K $\alpha$ / $\beta$ -high U87MG and PI3K $\beta$ -high SF295 cells were transfected with the empty pBABE vector or a plasmid pBABE-PIK3CA-E545K that encodes a constitutively active PI3K mutant PI3K $\alpha$ -E545K. Cells were then treated with TGX-221 at different doses (0 to 50  $\mu$ M). Cell viability was measured using the MTS viability assay. Student *t* test or One-way ANOVA was used to determine *P* values. ns: not significant.
